# Supplementary material for: Low Molecular Weight Kappa-Carrageenan Based Microspheres for Enhancing Stability and Bioavailability of Tea Polyphenols
Source: MDPI journal article supplement (doi:10.3390/pr9071240), 2021-07-18
Supplement: s1 [file s1]

Supplementary material: the concentrations of LK-CG, TP, rapeseed oil, Span80 and n-butanol were optimized as follow.

1. The impact of LK-CG on particle size, loading rate and encapsulation rate.

**Table S1.** The impact of LK-CG on particle size, loading rate and encapsulation rate.

| LK-CG (%) | Particle Size (μm) | Loading Rate (%) | Encapsulation Rate (%) |
|-----------|--------------------|------------------|------------------------|
| 0.2       | 5.3                | 4.06             | 11.71                  |
| 0.6       | 10.4               | 5.41             | 18.06                  |
| 1         | 7.58               | 7.83             | 20.82                  |
| 1.4       | 4.62               | 6.87             | 17.25                  |
| 1.8       | 5.90               | 5.35             | 14.39                  |

2. The impact of LK-CG to TP ratio on particle size, loading rate and encapsulation rate.

**Table S2.** The impact of LK-CG to TP ratio on particle size, loading rate and encapsulation rate.

| LK-CG to TP Ratio | Particle Size (μm) | Loading Rate (%) | Encapsulation Rate (%) |
|-------------------|--------------------|------------------|------------------------|
| 1:1               | 3.86               | 4.86             | 14.73                  |
| 2:1               | 5.39               | 7.48             | 20.18                  |
| 3:1               | 4.95               | 3.01             | 18.52                  |
| 4:1               | 4.08               | 2.39             | 13.20                  |
| 5:1               | 3.42               | 1.93             | 12.09                  |

3. The impact of water to oil ratio on particle size, loading rate and encapsulation rate.

**Table S3.** The impact of water to oil ratio on particle size, loading rate and encapsulation rate.

| Water to Oil Ratio | Particle Size (μm) | Loading Rate (%) | Encapsulation Rate (%) |
|--------------------|--------------------|------------------|------------------------|
| 1:1                | 4.32               | 3.17             | 10.05                  |
| 3:1                | 5.57               | 5.56             | 16.18                  |
| 5:1                | 6.69               | 7.28             | 19.73                  |
| 7:1                | 5.15               | 6.35             | 17.98                  |
| 9:1                | 4.03               | 4.11             | 13.04                  |

4. The impact of Span80 concentration on particle size, loading rate and encapsulation rate.

**Table S4.** The impact of Span80 on particle size, loading rate and encapsulation rate.

| Span80 (%) | Particle Size (μm) | Loading Rate (%) | Encapsulation Rate (%) |
|------------|--------------------|------------------|------------------------|
| 1          | 4.24               | 5.69             | 30.21                  |
| 2          | 5.17               | 6.31             | 26.68                  |
| 3          | 6.46               | 7.97             | 24.03                  |
| 4          | 5.81               | 6.48             | 21.15                  |
| 5          | 3.02               | 6.09             | 19.49                  |

5. The impact of n-butanol concentration on particle size, loading rate and encapsulation rate.

**Table S5.** The impact of n-butanol on particle size, loading rate and encapsulation rate.

| n-Butanol (%) | Particle Size (μm) | Loading Rate (%) | Encapsulation Rate (%) |
|---------------|--------------------|------------------|------------------------|
| 1             | 3.21               | 4.91             | 11.49                  |
| 2             | 4.96               | 6.46             | 15.32                  |
| 3             | 5.30               | 7.24             | 19.73                  |
| 4             | 4.74               | 5.64             | 17.52                  |
| 5             | 3.08               | 4.27             | 12.90                  |
